# Supplementary material for: Low risk of haematomas with intramuscular vaccines in anticoagulated patients: a systematic review with meta-analysis
Source: PubMed Central journal article supplement (PMC8848629; doi:10.1186/s12959-022-00367-1), 2022-02-16
Supplement: 12959_2022_367_MOESM1_ESM.pdf [file 12959_2022_367_MOESM1_ESM.pdf]

# **SUPPLEMENTARY MATERIAL**

## **Low risk of haematomas with intramuscular vaccines in anticoagulated patients: a systematic review with meta-analysis**

Authors: Daniel Caldeira, Bárbara Sucena Rodrigues, Mariana Alves, Fausto J. Pinto, Joaquim J Ferreira.

**Corresponding author:**

Daniel Caldeira, MD, PhD

Laboratory of Clinical Pharmacology and Therapeutics, Faculdade de Medicina,  
Universidade de Lisboa, Portugal. Centro Cardiovascular da Universidade de Lisboa -  
CCUL, CAML, Faculdade de Medicina, Universidade de Lisboa, Portugal.

## Contents

|                                                                                                                                         |          |
|-----------------------------------------------------------------------------------------------------------------------------------------|----------|
| <b>Supplementary Table 1: Search Strategy .....</b>                                                                                     | <b>3</b> |
| <b>Supplementary Table 2: Key excluded studies.....</b>                                                                                 | <b>4</b> |
| <b>Supplementary Table 3: Risk of bias evaluation using an adapted tool of Hoy et al.....</b>                                           | <b>5</b> |
| <b>Supplementary Table 4: Risk of bias evaluation using the Cochrane Risk of Bias Tool.....</b>                                         | <b>6</b> |
| <b>Supplementary Figure 1: Incidence of haematomas according with the risk of bias. ....</b>                                            | <b>7</b> |
| <b>Supplementary Figure 3: Forest plot evaluating the incidence of haematomas without the continuity correction.....</b>                | <b>8</b> |
| <b>Supplementary Figure 4: Regression line representing the Egger test. ....</b>                                                        | <b>8</b> |
| <b>Supplementary Figure 5: Funnel plot for the studies and estimates included in the intramuscular vs. subcutaneous comparison.....</b> | <b>9</b> |

## Supplementary Table 1: Search Strategy

| #  | Searches                                                                                 |
|----|------------------------------------------------------------------------------------------|
| 1  | vaccin*.ti,ab.                                                                           |
| 2  | exp Vaccines/                                                                            |
| 3  | exp Immunization/                                                                        |
| 4  | immunization.ti,ab.                                                                      |
| 5  | 1 or 2 or 3 or 4                                                                         |
| 6  | anticoagulat*.ti,ab.                                                                     |
| 7  | anticoagulant*.ti,ab.                                                                    |
| 8  | hypocoagula*.ti,ab.                                                                      |
| 9  | exp Anticoagulants/                                                                      |
| 10 | warfarin.ti,ab.                                                                          |
| 11 | acenocoumarol.ti,ab.                                                                     |
| 12 | phenprocoumon.ti,ab.                                                                     |
| 13 | fluindione.ti,ab.                                                                        |
| 14 | NOAC*.ti,ab.                                                                             |
| 15 | non-vitamin K antagonist oral anticoagulant*.ti,ab.                                      |
| 16 | DOAC*.ti,ab.                                                                             |
| 17 | direct oral anticoagulant*.ti,ab.                                                        |
| 18 | apixaban.ti,ab.                                                                          |
| 19 | dabigatran.ti,ab.                                                                        |
| 20 | edoxaban.ti,ab.                                                                          |
| 21 | rivaroxaban.ti,ab.                                                                       |
| 22 | 6 or 7 or 8 or 9 or 10 or 11 or 12 or 13 or 14 or 15 or 16 or 17 or 18 or 19 or 20 or 21 |
| 23 | 5 and 22                                                                                 |

## Supplementary Table 2: Key excluded studies

| Study (author and year) | Reason for exclusion                 |
|-------------------------|--------------------------------------|
| Ionescu 1984            | Wrong publication type               |
| DeDea 2011              | Wrong publication type               |
| DeDea 2012              | Wrong publication type               |
| Behring 2009            | Wrong drug                           |
| Mancano 2018            | Wrong publication type               |
| Marder 2005             | Wrong publication type               |
| Iorio 2005              | Incomplete version of included study |
| Casajuana 2005          | Incomplete version of included study |
| Porter 2011             | Wrong publication type               |
| Ringwald 2009           | Wrong publication type               |
| Schwartz 2009           | Wrong publication type               |
| Sharma 2007             | Wrong publication type               |
| Sigell 1970             | Wrong publication type               |
| Thompson 2016           | Wrong publication type               |
| Yang 2014               | Wrong publication type               |
| Gomolin 1986            | Incomplete version of included study |
| Jackson 2007            | Wrong outcome                        |
| Poli 2002               | Wrong intervention                   |
| Chiarugi 1999           | Wrong intervention                   |
| Wiedermann 2012         | Wrong population                     |
| Deibe 2008              | Ongoing study                        |
| Wartel 2020             | Wrong population                     |

Supplementary Table 3: Risk of bias evaluation using an adapted tool of Hoy et al.

| Studies                | Representation | Sampling | Random selection | Minimal non-response | Direct data collection | Acceptable case definition | Measured parameter | Data collection mode | Numerator and denominator adequate | Summary overall risk |
|------------------------|----------------|----------|------------------|----------------------|------------------------|----------------------------|--------------------|----------------------|------------------------------------|----------------------|
| Patriarca 1983         |                |          |                  |                      |                        |                            |                    |                      |                                    | Moderate             |
| Lipsky 1984            |                |          |                  |                      |                        |                            |                    |                      |                                    | Moderate             |
| Kramer 1984            |                |          |                  |                      |                        |                            |                    |                      |                                    | Moderate             |
| Gomolin 1985           |                |          |                  |                      |                        |                            |                    |                      |                                    | Moderate             |
| Weibert 1986           |                |          |                  |                      |                        |                            |                    |                      |                                    | Moderate             |
| Bussey 1988            |                |          |                  |                      |                        |                            |                    |                      |                                    | Moderate             |
| Arnold 1990            |                |          |                  |                      |                        |                            |                    |                      |                                    | Moderate             |
| Raj 1995               |                |          |                  |                      |                        |                            |                    |                      |                                    | Moderate             |
| Delafuente 1998        |                |          |                  |                      |                        |                            |                    |                      |                                    | Moderate             |
| Palliani 2003          |                |          |                  |                      |                        |                            |                    |                      |                                    | Moderate             |
| Ballester Torrens 2005 |                |          |                  |                      |                        |                            |                    |                      |                                    | Moderate             |
| MacCallum 2007         |                |          |                  |                      |                        |                            |                    |                      |                                    | Moderate             |
| Casajuana 2008         |                |          |                  |                      |                        |                            |                    |                      |                                    | Moderate             |
| Iorio 2010             |                |          |                  |                      |                        |                            |                    |                      |                                    | Moderate             |
| von Aalsburg 2011      |                |          |                  |                      |                        |                            |                    |                      |                                    | Moderate             |
| Bauman 2016            |                |          |                  |                      |                        |                            |                    |                      |                                    | Moderate             |

Supplementary Table 4: Risk of bias evaluation using the Cochrane Risk of Bias Tool

|                        | Random sequence generation (selection bias) | Allocation concealment (selection bias) | Blinding of participants and personnel (performance bias) | Blinding of outcome assessment (detection bias) | Incomplete outcome data (attrition bias) | Selective reporting (reporting bias) | Other bias |
|------------------------|---------------------------------------------|-----------------------------------------|-----------------------------------------------------------|-------------------------------------------------|------------------------------------------|--------------------------------------|------------|
| Ballester Torrens 2005 | +                                           | +                                       | -                                                         | ?                                               | +                                        | +                                    | +          |
| Casajuana 2008         | +                                           | +                                       | -                                                         | ?                                               | +                                        | +                                    | +          |
| Delafuente 1998        | ?                                           | ?                                       | -                                                         | ?                                               | ?                                        | -                                    | +          |

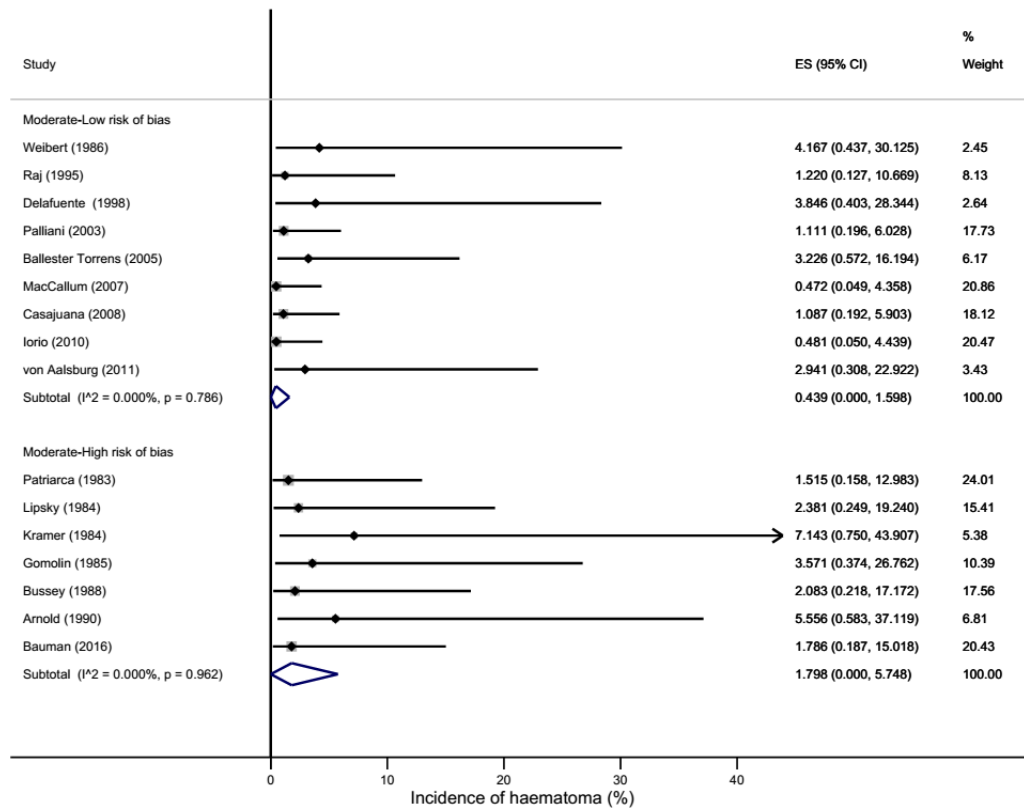

Supplementary Figure 1: Incidence of haematomas according with the risk of bias.

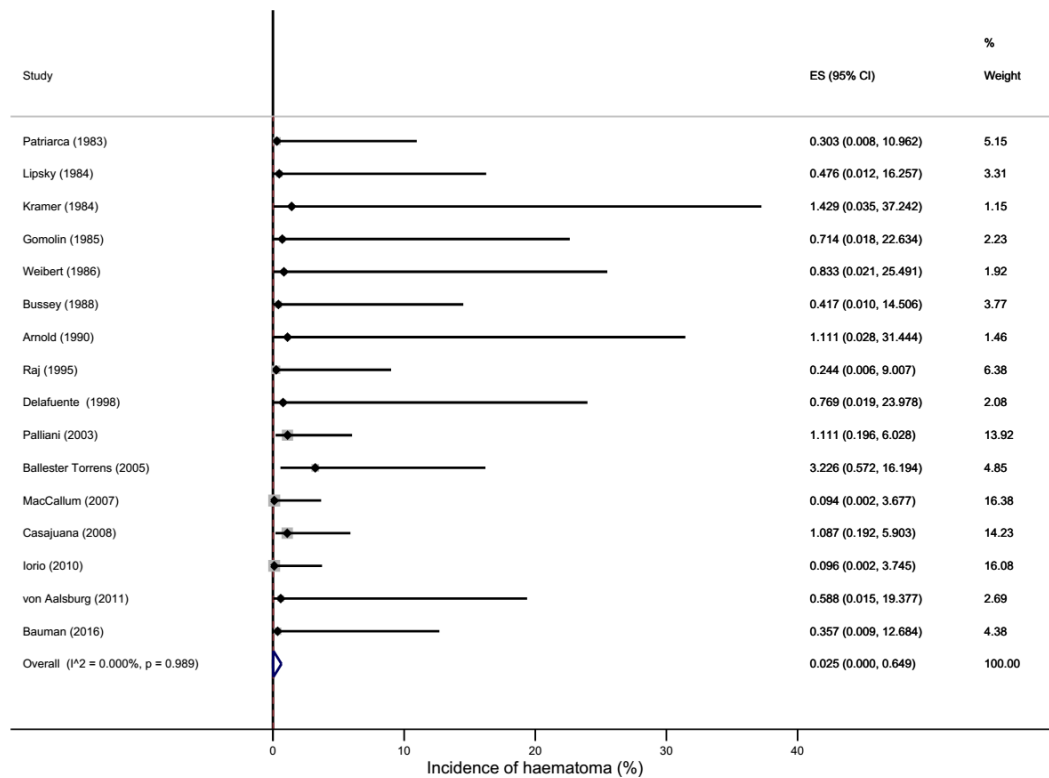

Supplementary Figure 2: Forest plot evaluating the incidence of haematomas using the continuity correction of 0.1, when required.

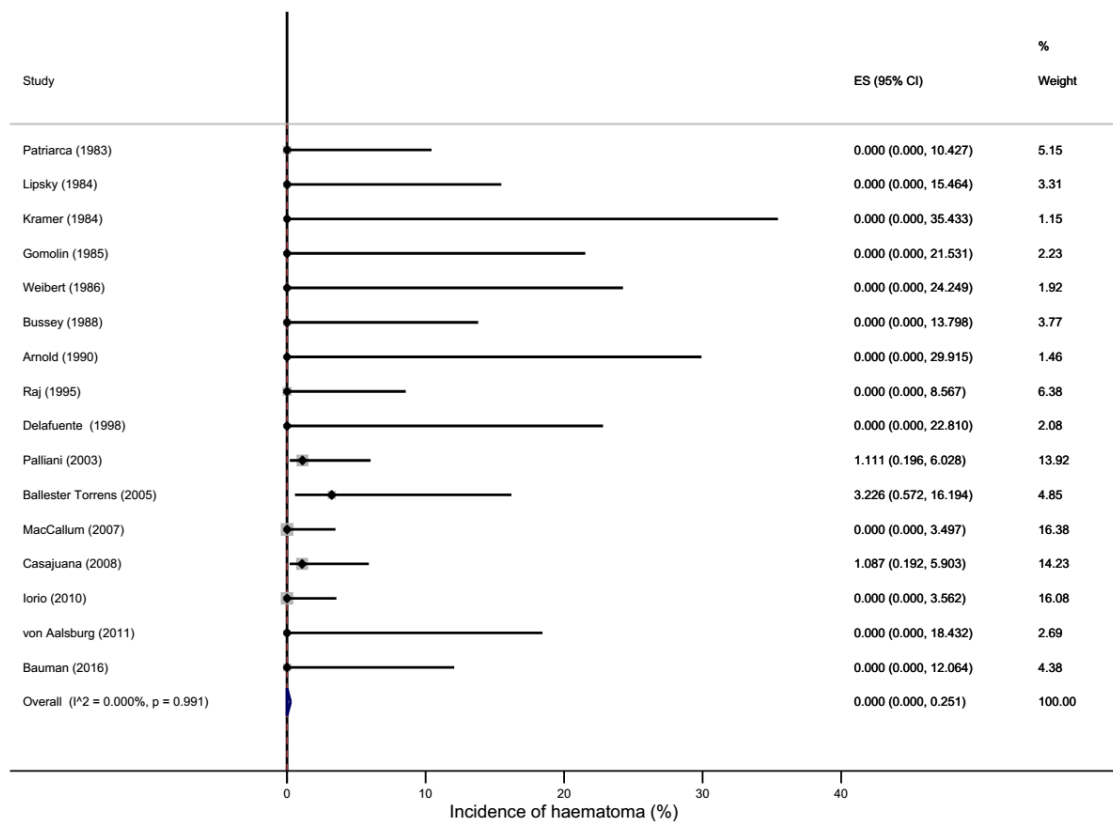

Supplementary Figure 3: Forest plot evaluating the incidence of haematomas without the continuity correction.

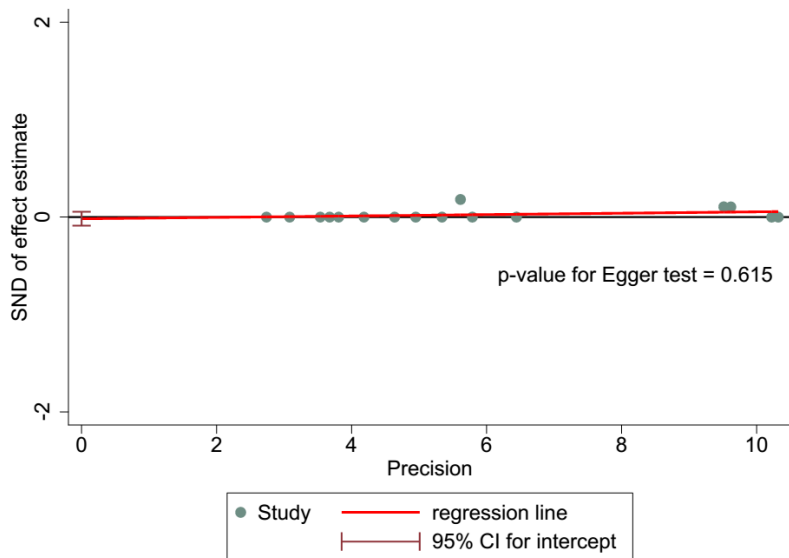

Supplementary Figure 4: Regression line representing the Egger test.



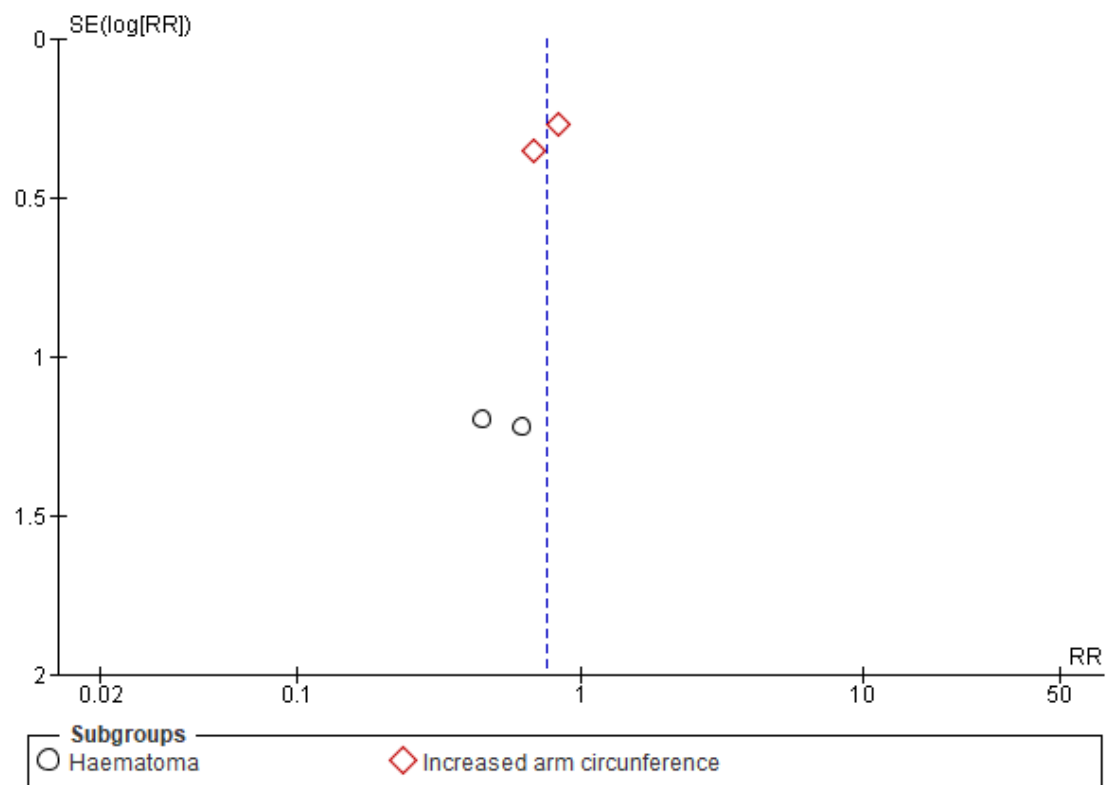

Supplementary Figure 5: Funnel plot for the studies and estimates included in the intramuscular vs. subcutaneous comparison. Due to the small number of studies, formal publication bias is not recommended.
